# Supplementary material for: Non-alcoholic fatty liver disease frequency and associated factors at admission of acute stroke
Source: PubMed Central journal article supplement (PMC8844138; doi:10.1007/s12072-021-10253-z), 2021-09-15
Supplement: 12072_2021_10253_MOESM1_ESM.pdf [file 12072_2021_10253_MOESM1_ESM.pdf]

## SUPPLEMENTAL MATERIAL

**Supplemental Table 1** Patients' characteristics (N=676)

| Variables              | Values               |
|------------------------|----------------------|
| NAFLD, n (%)           | 267 (39.5%)          |
| Male sex, n (%)        | 429 (63.5%)          |
| Age, years             | 70 (63, 75)          |
| BMI, kg/m <sup>2</sup> | 22.9 (20.5, 25.5)    |
| BH, cm                 | 164 (157, 169)       |
| BW, kg                 | 61 (53, 70)          |
| Alb, g/L               | 41 (38, 43)          |
| AST, U/L               | 23 (19, 29)          |
| ALT, U/L               | 19 (14,26)           |
| AST/ALT ratio          | 1.25 (1.0, 1.53)     |
| GGT, U/L               | 26.5 (18, 48)        |
| Glucose, mmol/L        | 6.77 (5.83, 8.44)    |
| HbA1c, % (NGSP)        | 5.9 (5.6, 6.4)       |
| TC, mmol/L             | 5.18 (4.47, 5.92)    |
| LDL, mmol/L            | 2.95 (2.33, 3.55)    |
| HDL, mmol/L            | 1.47 (1.20, 1.81)    |
| TG, mmol/L             | 1.16 (0.82, 1.90)    |
| SBP, mmHg              | 165 (145, 187)       |
| DBP, mmHg              | 93 (81, 105)         |
| MBP, mmHg              | 116.7 (103.7, 130.7) |

All values except for categorical data are represented as median (interquartile range). Abbreviations: ALT, alanine aminotransferase; AST, aspartate aminotransferase; BH, body height; Bold values denote significant correlation; BW, body weight; DBP, diastolic blood pressure at admission; DHA, docosahexaenoic acid; DGLA, dihomo-gamma-linolenic acid; GGT, gamma-glutamyl transpeptidase; HbA1c, glycated hemoglobin; HDL, high-density lipoprotein cholesterol; LDL, low-density lipoprotein cholesterol; MBP, mean blood pressure at admission; NAFLD, non-alcoholic fatty liver disease; NGSP, National Glycohemoglobin Standardization Program; SBP, systolic blood pressure at admission;  $r_s$ , Spearman correlation coefficient; TC, total cholesterol; TG, triglyceride.

**Supplemental Table 2** Serum fatty acids and weight percentages of total fatty acids

| Fatty acids                  | Values               |
|------------------------------|----------------------|
| <b>Saturated fatty acids</b> |                      |
| LaA, $\mu\text{mol/L}$       | 5.49 (2.99, 10.48)   |
| MyA, $\mu\text{mol/L}$       | 77.1 (55.6, 112.6)   |
| PA, $\mu\text{mol/L}$        | 2583 (2186, 3066)    |
| StA, $\mu\text{mol/L}$       | 682 (567.4, 798.2)   |
| LaA, %                       | 0.04 (0.02, 0.07)    |
| MyA, %                       | 0.62 (0.49, 0.83)    |
| PA, %                        | 23.5 (22.5, 24.5)    |
| StA, %                       | 6.78 (6.20, 7.34)    |
| <b>n-9 MUFA</b>              |                      |
| OIA, $\mu\text{mol/L}$       | 2117 (1734, 2721)    |
| OIA, %                       | 21.6 (19.5, 23.7)    |
| <b>n-6 PUFAs</b>             |                      |
| LiA, $\mu\text{mol/L}$       | 2656 (2262, 3112)    |
| DGLA, $\mu\text{mol/L}$      | 94.2 (75.0, 121.3)   |
| AA, $\mu\text{mol/L}$        | 529.6 (447.8, 626.2) |
| LiA, %                       | 26.2 (23.5, 28.5)    |
| DGLA, %                      | 1.03 (0.84, 1.21)    |
| AA, %                        | 5.67 (4.77, 6.56)    |
| <b>n-3 PUFAs</b>             |                      |
| AIA, $\mu\text{mol/L}$       | 68.9 (52.1, 97.6)    |
| EPA, $\mu\text{mol/L}$       | 202.4 (134.5, 303.4) |
| DHA, $\mu\text{mol/L}$       | 377.9 (295.9, 470.8) |
| AIA, %                       | 0.68 (0.56, 0.85)    |
| EPA, %                       | 2.1 (1.39, 3.11)     |
| DHA, %                       | 4.44 (3.51, 5.26)    |
| EPA/AA ratio                 | 0.36 (0.25, 0.56)    |
| n-6/n-3 ratio                | 4.41 (3.37, 5.56)    |

All values are represented as median (interquartile range). AA, arachidonic acid; AIA, alpha-linolenic acid; DGLA, Dihomo-gamma-linolenic acid; DHA, docosahexaenoic acid; EPA, eicosapentaenoic acid; LaA, lauric acid; LiA, linoleic acid; MyA, myristic acid; n-3 PUFA, n-3 polyunsaturated fatty acid; n-6 PUFA, n-6 polyunsaturated fatty acid; n-9 MUFA, n-9 monounsaturated fatty acid; OIA, oleic acid; PA, palmitic acid; StA, stearic acid; %: weight percentage of total fatty acids.

**Supplemental Table 3** Spearman's rank correlation coefficients between male sex and anthropometric variables

| $r_s$    | BH          | BW          | BMI         | Male sex    |
|----------|-------------|-------------|-------------|-------------|
| BH       |             | <b>0.62</b> | 0.16        | <b>0.72</b> |
| BW       | <b>0.62</b> |             | <b>0.85</b> | <b>0.51</b> |
| BMI      | 0.16        | <b>0.85</b> |             | 0.19        |
| Male sex | <b>0.72</b> | <b>0.51</b> | 0.19        |             |

Boldface indicates strong correlation.

BH, body height; BMI, body mass index; BW, body weight;

Bold values denote strong correlation;  $r_s$ , Spearman's rank correlation coefficient;

**Supplemental Table 4** Spearman's rank correlation coefficients between age, serum albumin, glucose, and lipid levels

| $r_s$   | Age   | Alb   | Glucose     | HbA1c       | TC          | LDL         | HDL   | TG    |
|---------|-------|-------|-------------|-------------|-------------|-------------|-------|-------|
| Age     |       | -0.23 | 0.07        | 0.11        | -0.19       | -0.09       | -0.05 | -0.15 |
| Alb     | -0.23 |       | 0.00        | -0.03       | 0.31        | 0.23        | 0.16  | 0.08  |
| Glucose | 0.07  | 0.00  |             | <b>0.53</b> | 0.03        | 0.04        | -0.12 | 0.10  |
| HbA1c   | 0.11  | -0.03 | <b>0.53</b> |             | 0.06        | 0.09        | -0.14 | 0.14  |
| TC      | -0.19 | 0.31  | 0.03        | 0.06        |             | <b>0.83</b> | 0.41  | 0.22  |
| LDL     | -0.09 | 0.23  | 0.04        | 0.09        | <b>0.83</b> |             | 0.16  | 0.00  |
| HDL     | -0.05 | 0.16  | -0.12       | -0.14       | 0.41        | 0.16        |       | -0.35 |
| TG      | -0.15 | 0.08  | 0.10        | 0.14        | 0.22        | 0.00        | -0.35 |       |

Boldface indicates strong correlation. Alb, albumin; HbA1c, glycated hemoglobin; HDL, high-density lipoprotein cholesterol; LDL, low-density lipoprotein cholesterol;  $r_s$ , Spearman's rank correlation coefficient; TC, total cholesterol; TG, triglycerides

**Supplemental Table 5** Spearman's rank correlation coefficients between variables of transaminase

| $r_s$         | AST         | ALT          | AST/ALT ratio | GGT   |
|---------------|-------------|--------------|---------------|-------|
| AST           |             | <b>0.70</b>  | 0.02          | 0.42  |
| ALT           | <b>0.70</b> |              | <b>-0.63</b>  | 0.48  |
| AST/ALT ratio | 0.02        | <b>-0.63</b> |               | -0.23 |
| GGT           | 0.42        | 0.48         | -0.23         |       |

Boldface indicates strong correlation.

ALT, alanine aminotransferase; AST, aspartate aminotransferase;

GGT, gamma-glutamyl transpeptidase;

$r_s$ , Spearman's rank correlation coefficient

**Supplemental Table 6** Spearman's rank correlation coefficients between variables of blood pressure

| $r_s$ | SBP         | DBP         | MBP         |
|-------|-------------|-------------|-------------|
| SBP   |             | <b>0.60</b> | <b>0.87</b> |
| DBP   | <b>0.60</b> |             | <b>0.91</b> |
| MBP   | <b>0.87</b> | <b>0.91</b> |             |

Boldface indicates strong correlation.

DBP, diastolic blood pressure at admission;

MBP, mean blood pressure at admission;

SBP, systolic blood pressure at admission;

$r_s$ , Spearman's rank correlation coefficient

**Supplemental Table 7** Spearman’s rank correlation coefficients between serum fatty acids

| $r_s$   | LaA         | MyA         | PA          | StA         | OIA         | LiA         | DGLA        | AA    | AIA         | EPA          | DHA          | EPA/<br>AA   | n-6/n-3      |
|---------|-------------|-------------|-------------|-------------|-------------|-------------|-------------|-------|-------------|--------------|--------------|--------------|--------------|
| LaA     |             | <b>0.84</b> | <b>0.55</b> | <b>0.61</b> | <b>0.53</b> | 0.49        | 0.44        | 0.08  | <b>0.56</b> | -0.05        | 0.06         | -0.08        | 0.19         |
| MyA     | <b>0.84</b> |             | <b>0.77</b> | <b>0.76</b> | <b>0.73</b> | <b>0.59</b> | <b>0.58</b> | 0.21  | <b>0.70</b> | 0.09         | 0.28         | -0.00        | 0.07         |
| PA      | <b>0.55</b> | <b>0.77</b> |             | <b>0.81</b> | <b>0.91</b> | <b>0.71</b> | <b>0.60</b> | 0.47  | <b>0.66</b> | 0.12         | 0.45         | -0.08        | 0.06         |
| StA     | <b>0.61</b> | <b>0.76</b> | <b>0.81</b> |             | <b>0.74</b> | <b>0.73</b> | <b>0.61</b> | 0.46  | <b>0.65</b> | 0.16         | 0.42         | -0.03        | 0.06         |
| OIA     | <b>0.53</b> | <b>0.73</b> | <b>0.91</b> | <b>0.74</b> |             | <b>0.64</b> | <b>0.59</b> | 0.38  | <b>0.66</b> | -0.00        | 0.32         | -0.16        | 0.15         |
| LiA     | 0.49        | <b>0.59</b> | <b>0.71</b> | <b>0.73</b> | <b>0.64</b> |             | 0.49        | 0.32  | <b>0.73</b> | -0.06        | 0.23         | -0.19        | 0.37         |
| DGLA    | 0.44        | <b>0.58</b> | <b>0.60</b> | <b>0.61</b> | <b>0.59</b> | 0.49        |             | 0.41  | 0.40        | -0.22        | 0.06         | -0.38        | 0.36         |
| AA      | 0.08        | 0.21        | 0.47        | 0.46        | 0.38        | 0.32        | 0.41        |       | 0.16        | 0.16         | 0.35         | -0.24        | 0.02         |
| AIA     | <b>0.56</b> | <b>0.70</b> | <b>0.66</b> | <b>0.65</b> | <b>0.66</b> | <b>0.73</b> | 0.40        | 0.16  |             | 0.09         | 0.31         | 0.02         | 0.08         |
| EPA     | -0.05       | 0.09        | 0.12        | 0.16        | -0.00       | -0.06       | -0.22       | 0.16  | 0.09        |              | <b>0.68</b>  | <b>0.90</b>  | <b>-0.87</b> |
| DHA     | 0.06        | 0.28        | 0.45        | 0.42        | 0.32        | 0.23        | 0.06        | 0.35  | 0.31        | <b>0.68</b>  |              | <b>0.52</b>  | <b>-0.68</b> |
| EPA/AA  | -0.08       | -0.00       | -0.08       | -0.03       | -0.16       | -0.19       | -0.38       | -0.24 | 0.02        | <b>0.90</b>  | <b>0.52</b>  |              | <b>-0.87</b> |
| n-6/n-3 | 0.19        | 0.07        | 0.06        | 0.06        | 0.15        | 0.37        | 0.36        | 0.02  | 0.08        | <b>-0.87</b> | <b>-0.68</b> | <b>-0.87</b> |              |

Boldface indicates strong correlation.

AA, arachidonic acid; AIA, alpha-linolenic acid; DHA, docosahexaenoic acid; DGLA, dihomo-gamma-linolenic acid; EPA, eicosapentaenoic acid; LaA, lauric acid; LiA, linoleic acid; MyA, myristic acid; OIA, oleic acid; PA, palmitic acid; StA, stearic acid; Bold values, significant correlation;  $r_s$ , Spearman’s rank correlation coefficient; n-3, n-3 polyunsaturated fatty acids; n-6, n-6 polyunsaturated fatty acids

**Supplemental Table 8** Spearman's rank correlation coefficients between serum fatty acid weight percentages

| $r_s$  | LaA %       | MyA %       | PA %         | StA % | OIA % | LiA % | DGLA % | AA %  | AIA % | EPA %       | DHA %       |
|--------|-------------|-------------|--------------|-------|-------|-------|--------|-------|-------|-------------|-------------|
| LaA %  |             | <b>0.80</b> | 0.18         | 0.26  | 0.23  | -0.00 | 0.12   | -0.40 | 0.37  | -0.22       | -0.33       |
| MyA %  | <b>0.80</b> |             | 0.26         | 0.19  | 0.30  | 0.17  | 0.17   | 0.47  | 0.42  | -0.15       | -0.23       |
| PA %   | 0.18        | 0.26        |              | -0.26 | -0.30 | -0.51 | 0.08   | -0.19 | -0.15 | -0.17       | -0.12       |
| StA %  | 0.26        | 0.19        | -0.26        |       | -0.30 | 0.07  | 0.19   | 0.06  | -0.00 | 0.07        | 0.02        |
| OIA %  | 0.23        | 0.30        | -0.30        | -0.30 |       | -0.43 | 0.05   | -0.40 | 0.16  | -0.44       | -0.42       |
| LiA %  | -0.00       | 0.17        | <b>-0.51</b> | 0.07  | -0.43 |       | 0.02   | -0.10 | 0.23  | -0.27       | -0.24       |
| DGLA % | 0.12        | 0.17        | 0.08         | 0.19  | 0.05  | 0.02  |        | 0.14  | -0.13 | -0.38       | -0.32       |
| AA %   | -0.40       | 0.47        | -0.19        | 0.06  | -0.40 | -0.10 | 0.14   |       | -0.49 | 0.18        | 0.23        |
| AIA %  | 0.37        | 0.42        | -0.15        | -0.00 | 0.16  | 0.23  | -0.13  | -0.49 |       | -0.11       | -0.14       |
| EPA %  | -0.22       | -0.22       | -0.17        | 0.07  | -0.44 | -0.27 | -0.38  | 0.18  | -0.11 |             | <b>0.73</b> |
| DHA %  | -0.33       | -0.33       | -0.12        | 0.02  | -0.42 | -0.24 | -0.32  | 0.23  | -0.14 | <b>0.73</b> |             |

Boldface indicates strong correlation.

AA, arachidonic acid; AIA, alpha-linolenic acid; DHA, docosahexaenoic acid; DGLA, dihomo-gamma-linolenic acid; EPA, eicosapentaenoic acid; LaA, lauric acid; LiA, linoleic acid; MyA, myristic acid; OIA, oleic acid; PA, palmitic acid; StA, stearic acid; Bold values, significant correlation;  $r_s$ , Spearman's rank correlation coefficient, %, weight percentage of total fatty acids.



**Supplemental Table 9** Spearman's rank correlation coefficients between anthropometric variables, hepatic variables, and diastolic blood pressure

| $r_s$         | BMI   | BH    | AST/ALT ratio | GGT   | DBP   |
|---------------|-------|-------|---------------|-------|-------|
| BMI           |       | 0.16  | -0.38         | 0.17  | 0.15  |
| BH            | 0.16  |       | -0.14         | 0.21  | 0.09  |
| AST/ALT ratio | -0.38 | -0.38 |               | -0.23 | -0.05 |
| GGT           | 0.17  | 0.17  | -0.23         |       | 0.17  |
| DBP           | 0.15  | 0.15  | -0.05         | 0.17  |       |

ALT, alanine aminotransferase; AST, aspartate aminotransferase; BH, body height; DBP, diastolic blood pressure; GGT, gamma-glutamyl transpeptidase;  $r_s$ , Spearman's rank correlation coefficient.

**Supplemental Table 10** Spearman's rank correlation coefficients between selected fatty acids and fatty acid percentages

| $r_s$ | MyA%  | PA%  | StA%  | OIA%  | DGLA%       | AA%         |
|-------|-------|------|-------|-------|-------------|-------------|
| DGLA  | 0.43  | 0.21 | 0.08  | 0.37  | <b>0.74</b> | -0.16       |
| AA    | -0.02 | 0.03 | -0.03 | 0.07  | 0.11        | <b>0.53</b> |
| DHA   | 0.10  | 0.06 | -0.07 | -0.04 | -0.31       | -0.06       |

Boldface indicates strong correlation.

AA, arachidonic acid; DHA, docosahexaenoic acid; DGLA, dihomo-gamma-linolenic acid;

MyA, myristic acid; OIA, oleic acid; PA, palmitic acid; StA, stearic acid;

$r_s$ , Spearman's rank correlation coefficient; %, weight percentage of total fatty acids

**Supplemental Table 11** Spearman's rank correlation coefficients between age, selected serum variables, and fatty acids

| $r_s$ | DGLA  | DHA  | MyA%  | PA%   | StA%  | OIA%        | AA%   |
|-------|-------|------|-------|-------|-------|-------------|-------|
| Age   | -0.32 | 0.09 | -0.07 | -0.06 | -0.06 | -0.16       | 0.04  |
| Alb   | 0.20  | 0.11 | 0.08  | -0.05 | 0.01  | -0.07       | 0.04  |
| HbA1c | 0.04  | 0.06 | 0.01  | 0.16  | -0.17 | 0.07        | -0.07 |
| TC    | 0.38  | 0.37 | 0.08  | -0.08 | 0.06  | -0.16       | -0.01 |
| HDL   | -0.01 | 0.14 | -0.09 | -0.16 | 0.35  | -0.45       | 0.24  |
| TG    | 0.48  | 0.27 | -0.09 | 0.31  | -0.20 | <b>0.59</b> | -0.37 |

AA, arachidonic acid; Alb, albumin; DHA, docosahexaenoic acid; DGLA, dihomo-gamma-linolenic acid; HbA1c, glycated hemoglobin; HDL-C, high-density lipoprotein cholesterol; MyA, myristic acid; OIA, oleic acid; PA, palmitic acid; StA, stearic acid;  $r_s$ , Spearman's rank correlation coefficient; TC, total cholesterol; TG, triglyceride; %, weight percentage of total fatty acids.

**Supplemental Table 12** Spearman's rank correlation coefficients between anthropometric variables, age, selected serum variables, and fatty acids

| <i>r<sub>s</sub></i> | Age   | Alb   | HbA1c | TC    | HDL   | TG    | DGLA  | DHA   | MyA%  | PA%   | StA%  | AA%   |
|----------------------|-------|-------|-------|-------|-------|-------|-------|-------|-------|-------|-------|-------|
| BMI                  | -0.19 | 0.12  | 0.23  | 0.01  | -0.27 | 0.27  | 0.28  | 0.04  | 0.11  | 0.16  | -0.17 | -0.10 |
| BH                   | -0.18 | 0.00  | 0.07  | -0.18 | -0.19 | 0.09  | 0.00  | -0.11 | 0.02  | 0.20  | -0.08 | -0.03 |
| AST/ALT<br>ratio     | 0.27  | -0.21 | -0.20 | -0.05 | 0.16  | -0.16 | -0.20 | -0.01 | -0.13 | -0.09 | -0.02 | 0.03  |
| GGT                  | -0.13 | -0.04 | 0.08  | -0.03 | -0.07 | 0.27  | 0.18  | 0.08  | 0.15  | 0.32  | 0.01  | -0.12 |
| DBP                  | -0.29 | 0.27  | -0.02 | 0.23  | 0.09  | 0.18  | 0.26  | 0.05  | 0.14  | 0.08  | 0.03  | -0.12 |

AA, arachidonic acid; Alb, albumin; ALT, alanine aminotransferase; AST, aspartate aminotransferase; BH, body height; DBP, diastolic blood pressure; DHA, docosahexaenoic acid; DGLA, dihomo-gamma-linolenic acid; GGT, gamma-glutamyl transpeptidase; HbA1c, glycated hemoglobin; HDL, high-density lipoprotein cholesterol; MyA, myristic acid; PA, palmitic acid; StA, stearic acid; *r<sub>s</sub>*, Spearman's rank correlation coefficient; TC, total cholesterol; TG, triglyceride; %, weight percentage of total fatty acids.

**Supplemental Table 13** Variance inflation factor of variables for multiple logistic regression analysis

|               | VIF  |
|---------------|------|
| BMI           | 1.31 |
| AST/ALT ratio | 1.25 |
| Alb           | 1.38 |
| PA%           | 1.46 |
| DGLA          | 1.97 |
| DHA           | 1.33 |
| HbA1c         | 1.07 |
| HDL           | 1.71 |
| GGT           | 1.14 |
| DBP           | 1.26 |
| TG            | 1.90 |
| MyA%          | 1.85 |
| BH            | 1.18 |
| StA%          | 1.40 |
| AA%           | 1.37 |
| Age           | 1.35 |
| TC            | 1.91 |

AA, arachidonic acid; Alb, albumin; AUC, area under the curve; BH, body height; BIC, Bayesian information criterion; BMI, body mass index; DBP, diastolic blood pressure at admission; DGLA, dihomo-gamma-linolenic acid; DHA, docosahexaenoic acid; GGT, gamma-glutamyl transpeptidase; HbA1c, glycated hemoglobin; HDL, high-density lipoprotein cholesterol; MyA, myristic acid; *P*, probability; PA, palmitic acid; StA, stearic acid; TC, total cholesterol; TG, triglyceride; VIF, variance inflation factor; %, weight percentage of total fatty acids.
